# Supplementary material for: Genomic analysis and replication kinetics of the closely related EHV-1 neuropathogenic 21P40 and abortigenic 97P70 strains
Source: Springer Nature journal article supplement (doi:10.1186/s13567-024-01434-3), 2025-01-13
Supplement: MOESM1 [file 13567_2024_1434_MOESM1_ESM.pdf]

| ORF<br>LOCI              | Accession<br>Number | Country     | Year | Phenotype       | 30<br>291 | 30<br>752 | 32<br>180 | 40<br>258 | 65<br>207 |
|--------------------------|---------------------|-------------|------|-----------------|-----------|-----------|-----------|-----------|-----------|
| BE/21P40/2021            | MW855958            | Belgium     | 2021 | Neuropathogenic | I         | N         | T         | C         | N         |
| BE/21P41/2021            | MW855959            | Belgium     | 2021 | Neuropathogenic | I         | N         | T         | C         | N         |
| BE/21P43_BD5/2021        | MW855960            | Belgium     | 2021 | Neuropathogenic | I         | N         | T         | C         | N         |
| FR/Valencia1/2021        | MW855961            | France      | 2021 | Neuropathogenic | I         | N         | T         | C         | N         |
| FR/Valencia2/2021        | MW855962            | France      | 2021 | Neuropathogenic | I         | N         | T         | C         | N         |
| H3_Allg_92_21/CH/2021    | MZ357402            | Switzerland | 2021 | Neuropathogenic | I         | N         | T         | C         | N         |
| YM2019                   | MT063054            | China       | 2019 | Abortigenic     | S         | N         | T         | C         | D         |
| EHV1_A130                | MW316760            | Serbia      | 2018 | Abortigenic     | -         | D         | -         | -         | -         |
| FR-56628                 | MT968035            | France      | 2018 | Neuropathogenic | S         | H         | -         | -         | -         |
| BRE/20/2018              | MN688630            | France      | 2018 | -               | S         | N         | -         | -         | -         |
| NORM/18/2018             | MN688629            | France      | 2018 | Abortigenic     | S         | N         | -         | -         | -         |
| NORM/17/2018             | MN688628            | France      | 2018 | Abortigenic     | S         | N         | -         | -         | -         |
| RHONEALPES/16/2018       | MN688627            | France      | 2018 | Abortigenic     | S         | N         | -         | -         | -         |
| ILEDEFR/14/2018          | MN688626            | France      | 2018 | Respiratory     | S         | D         | -         | -         | -         |
| BELG/12/2017             | MN688625            | Belgium     | 2017 | Abortigenic     | S         | N         | -         | -         | -         |
| BELG/10/2016             | MN688624            | Belgium     | 2016 | Abortigenic     | S         | N         | -         | -         | -         |
| Hertfordshire/150/2016   | KY852346            | UK          | 2016 | Abortigenic     | S         | N         | T         | C         | -         |
| NELLEAQU/9/2015          | MN688623            | France      | 2015 | -               | S         | N         | -         | -         | -         |
| NORM/8/2015              | MN688622            | France      | 2015 | Abortigenic     | S         | N         | -         | -         | -         |
| EHV1/Meerut/2014         | MT077857            | India       | 2014 | Abortigenic     | S         | N         | T         | C         | -         |
| EHV1/Hisar-14/2014       | MN912433            | India       | 2014 | Abortigenic     | S         | N         | T         | C         | D         |
| NORM/6/2013              | MN688621            | France      | 2013 | Abortigenic     | S         | N         | -         | -         | -         |
| Oxfordshire/207/2013     | KU206471            | UK          | 2013 | Neuropathogenic | S         | N         | T         | C         | -         |
| Oxfordshire/206/2013     | KU206470            | UK          | 2013 | Neuropathogenic | S         | N         | T         | C         | -         |
| Aberdeenshire/84/2013    | KU206461            | UK          | 2013 | Abortigenic     | S         | N         | -         | -         | -         |
| Suffolk/41/2013          | KU206458            | UK          | 2013 | Abortigenic     | S         | D         | -         | -         | -         |
| Suffolk/45/2013          | KU206452            | UK          | 2013 | Abortigenic     | S         | N         | -         | -         | -         |
| Gloucestershire/114/2013 | KU206450            | UK          | 2013 | Neuropathogenic | S         | D         | T         | C         | -         |
| Gloucestershire/108/2013 | KU206449            | UK          | 2013 | Neuropathogenic | S         | D         | T         | C         | -         |
| Gloucestershire/70/2013  | KU206448            | UK          | 2013 | Neuropathogenic | S         | D         | T         | C         | -         |
| Gloucestershire/54/2013  | KU206447            | UK          | 2013 | Neuropathogenic | S         | D         | T         | C         | -         |
| Gloucestershire/77/2013  | KU206446            | UK          | 2013 | Neuropathogenic | S         | D         | T         | C         | -         |
| Suffolk/89/2013          | KU206442            | UK          | 2013 | Abortigenic     | S         | N         | -         | -         | -         |
| Suffolk/82/2013          | KU206441            | UK          | 2013 | Abortigenic     | S         | N         | -         | -         | -         |
| Cambridgeshire/96/2013   | KU206439            | UK          | 2013 | Abortigenic     | S         | N         | -         | -         | -         |
| Suffolk/125/2013         | KU206426            | UK          | 2013 | Abortigenic     | S         | N         | -         | -         | -         |

|                          |          |           |      |                 |   |   |   |   |   |
|--------------------------|----------|-----------|------|-----------------|---|---|---|---|---|
| Suffolk/48/2013          | KU206425 | UK        | 2013 | Abortigenic     | S | N | - | - | - |
| T970                     | KC924817 | USA       | 2013 | Neuropathogenic | S | D | - | - | - |
| T956                     | KC924814 | USA       | 2013 | Neuropathogenic | S | D | - | - | - |
| T75                      | KC924808 | USA       | 2013 | Abortigenic     | S | N | - | - | - |
| T493                     | KC924800 | USA       | 2013 | Abortigenic     | S | N | - | - | - |
| FR-6815                  | -        | France    | 2013 | Abortigenic     | - | N | - | - | - |
| NORM/5/2012              | MN688620 | France    | 2012 | Abortigenic     | S | N | - | - | - |
| NORM/4/2012              | MN688619 | France    | 2012 | Abortigenic     | S | D | - | - | - |
| ILEDEFR/3/2012           | MN688618 | France    | 2012 | Abortigenic     | S | N | - | - | - |
| Lincolnshire/2/2012      | KU206475 | UK        | 2012 | Abortigenic     | S | N | - | - | - |
| Suffolk/10/2012          | KU206474 | UK        | 2012 | Abortigenic     | S | N | - | - | - |
| Devonshire/97/2012       | KU206469 | UK        | 2012 | Neuropathogenic | S | N | T | C | - |
| Buckinghamshire/24/2012  | KU206431 | UK        | 2012 | Abortigenic     | S | N | - | - | - |
| KyA                      | MF975655 | USA       | 2011 | Abortigenic     | S | D | T | C | D |
| Oxfordshire/34/2011      | KU206457 | UK        | 2011 | Abortigenic     | S | D | - | - | - |
| Oxfordshire/31/2011      | KU206456 | UK        | 2011 | Abortigenic     | S | D | - | - | - |
| Buckinghamshire/93/2011  | KU206455 | UK        | 2011 | Abortigenic     | S | D | - | - | - |
| Oxfordshire/27/2011      | KU206454 | UK        | 2011 | Neuropathogenic | S | D | T | C | - |
| NORM/2/2010              | MN688617 | France    | 2010 | Abortigenic     | S | N | - | - | - |
| Hertfordshire/188/2010   | KU206466 | UK        | 2010 | Neuropathogenic | S | D | T | C | - |
| Buckinghamshire/114/2010 | KU206433 | UK        | 2010 | Abortigenic     | S | N | - | - | - |
| Norfolk/124/2010         | KU206427 | UK        | 2010 | Abortigenic     | S | N | - | - | - |
| Cheshire/275/2010        | KU206406 | UK        | 2010 | Abortigenic     | S | N | T | C | - |
| T953_P210                | KR047045 | USA       | 2010 | Neuropathogenic | S | D | T | C | D |
| T953_P135                | KR021354 | USA       | 2010 | Neuropathogenic | S | D | T | C | D |
| Hertfordshire/109/2009   | KU206476 | UK        | 2009 | Abortigenic     | S | N | - | - | - |
| Suffolk/87/2009          | KU206443 | UK        | 2009 | Abortigenic     | S | N | - | - | - |
| Berkshire/64/2009        | KU206438 | UK        | 2009 | Abortigenic     | S | N | - | - | - |
| Hampshire/77/2009        | KU206419 | UK        | 2009 | Abortigenic     | S | N | - | - | - |
| T953_P15                 | KP975078 | USA       | 2009 | Neuropathogenic | S | D | T | C | D |
| FR-38991                 | -        | France    | 2009 | Neuropathogenic | - | D | - | - | - |
| Hampshire/1/2008         | KU206462 | UK        | 2008 | Abortigenic     | S | N | - | - | - |
| 3038-07                  | KT324726 | Australia | 2007 | Neuropathogenic | S | N | T | C | D |
| 3045-07                  | KT324725 | Australia | 2007 | Abortigenic     | S | N | T | C | D |
| Shropshire/167/2006      | KU206405 | UK        | 2006 | Abortigenic     | S | N | T | C | - |
| Suffolk/123/2005         | KU206480 | UK        | 2005 | Abortigenic     | S | N | - | - | - |
| Suffolk/48/2005          | KU206430 | UK        | 2005 | Respiratory     | S | N | - | - | - |
| Essex/200/2005           | KU206411 | UK        | 2005 | Abortigenic     | S | N | T | C | - |
| Essex/199/2005           | KU206410 | UK        | 2005 | Abortigenic     | S | N | T | C | - |

|                          |           |           |      |                 |   |   |   |   |   |
|--------------------------|-----------|-----------|------|-----------------|---|---|---|---|---|
| Bristol/55/2004          | KU206424  | UK        | 2004 | Abortigenic     | S | N | - | - | - |
| Nottinghamshire/70/2004  | KU206420  | UK        | 2004 | Abortigenic     | S | N | - | - | - |
| Nottinghamshire/10/2004  | KU206404  | UK        | 2004 | Abortigenic     | S | N | T | C | - |
| 03P37                    | PP856397* | Belgium   | 2003 | Neuropathogenic | S | D | T | C | D |
| V592                     | AY464052  | UK        | 2003 | Abortigenic     | S | N | T | C | D |
| United Kingdom/58/2003   | KU206444  | UK        | 2003 | Neuropathogenic | S | D | T | C | - |
| Devon/28/2003            | KU206440  | UK        | 2003 | Respiratory     | S | D | - | - | - |
| 2222-03                  | KT324727  | Australia | 2003 | Abortigenic     | S | N | T | C | D |
| Derbyshire/39/2002       | KU206429  | UK        | 2002 | Abortigenic     | S | N | - | - | - |
| 1966-02                  | KT324729  | Australia | 2002 | Abortigenic     | S | N | T | C | D |
| 2019-02                  | KT324728  | Australia | 2002 | Abortigenic     | S | N | T | C | D |
| Leicestershire/13/2000   | KU206413  | UK        | 2000 | Abortigenic     | S | N | T | C | - |
| Yorkshire/114/1999       | KU206473  | UK        | 1999 | Abortigenic     | S | D | - | - | - |
| Gloucestershire/127/1998 | KU206445  | UK        | 1998 | Neuropathogenic | S | D | T | C | - |
| 97P70                    | PP856396* | Belgium   | 1997 | Abortigenic     | S | N | I | Y | D |
| Leicestershire/22/1996   | KU206464  | UK        | 1996 | Neuropathogenic | S | D | T | C | - |
| Berkshire/7/1996         | KU206463  | UK        | 1996 | Abortigenic     | S | N | - | - | - |
| Leicestershire/59/1996   | KU206423  | UK        | 1996 | Abortigenic     | S | N | - | - | - |
| Suffolk/60/1996          | KU206422  | UK        | 1996 | Abortigenic     | S | N | - | - | - |
| Wiltshire/40/1996        | KU206421  | UK        | 1996 | Abortigenic     | S | N | - | - | - |
| Suffolk/16/1996          | KU206417  | UK        | 1996 | Abortigenic     | S | N | - | - | - |
| Lincolnshire/13/1996     | KU206416  | UK        | 1996 | Abortigenic     | S | N | - | - | - |
| Lincolnshire/10/1996     | KU206412  | UK        | 1996 | Abortigenic     | S | N | T | C | - |
| Shropshire/38/1996       | KU206407  | UK        | 1996 | Abortigenic     | S | N | T | C | - |
| Cambridgeshire/3/1995    | KU206432  | UK        | 1995 | Abortigenic     | S | N | - | - | - |
| United Kingdom/58/1995   | KU206414  | UK        | 1995 | Abortigenic     | S | N | T | C | - |
| Suffolk/91/94            | KU206479  | UK        | 1994 | Abortigenic     | S | D | - | - | - |
| Essex/81/1994            | KU206472  | UK        | 1994 | Abortigenic     | S | N | - | - | - |
| Suffolk/110/1994         | KU206460  | UK        | 1994 | Abortigenic     | S | D | - | - | - |
| Kent/43/1994             | KU206453  | UK        | 1994 | Abortigenic     | S | D | - | - | - |
| United Kingdom/109/1994  | KU206434  | UK        | 1994 | Abortigenic     | S | N | - | - | - |
| Suffolk/82/1994          | KU206409  | UK        | 1994 | Respiratory     | S | N | T | C | - |
| 1074-94                  | KT324730  | Australia | 1994 | Abortigenic     | S | N | T | C | D |
| Bristol/2/1993           | KU206451  | UK        | 1993 | Abortigenic     | S | N | - | - | - |
| Buckinghamshire/9/1993   | KU206428  | UK        | 1993 | Abortigenic     | S | N | - | - | - |
| Yorkshire/1/1993         | KU206418  | UK        | 1993 | Abortigenic     | S | N | - | - | - |
| 1029-93                  | KT324731  | Australia | 1993 | Abortigenic     | S | N | T | C | D |
| Ab4                      | NC_001491 | UK        | 1992 | Neuropathogenic | S | D | T | C | D |
| Kent/177/1991            | KU206435  | UK        | 1991 | Abortigenic     | S | N | - | - | - |

|                         |          |             |      |                 |   |   |   |   |   |
|-------------------------|----------|-------------|------|-----------------|---|---|---|---|---|
| Yorkshire/12/1990       | KU206437 | UK          | 1990 | Abortigenic     | S | N | - | - | - |
| 970-90                  | KT324732 | Australia   | 1990 | Abortigenic     | S | N | T | C | D |
| Staffordshire/80/1989   | KU206436 | UK          | 1989 | Abortigenic     | S | N | - | - | - |
| Shropshire/68/1989      | KU206408 | UK          | 1989 | Abortigenic     | S | N | T | C | - |
| EHV1_A430               | MW316763 | Serbia      | 1987 | Abortigenic     | - | D | - | - | - |
| EHV1_A330               | MW316762 | Serbia      | 1987 | Abortigenic     | - | D | - | - | - |
| EHV1_A230               | MW316761 | Serbia      | 1987 | Abortigenic     | - | D | - | - | - |
| Suffolk/73/1985         | KU206459 | UK          | 1985 | Abortigenic     | S | D | - | - | - |
| United Kingdom/106/1985 | KU206415 | UK          | 1985 | Ocular          | S | N | T | C | - |
| Hong Kong/57/1984       | KU206467 | Hong Kong   | 1984 | Respiratory     | S | N | - | - | - |
| United Kingdom/32/1982  | KU206465 | UK          | 1982 | Abortigenic     | S | D | T | C | - |
| 717A-82                 | KT324733 | Australia   | 1982 | Neuropathogenic | S | N | T | C | D |
| 438-77                  | KT324734 | Australia   | 1977 | Abortigenic     | S | N | T | C | D |
| NZA-77                  | KT324724 | New Zealand | 1977 | Abortigenic     | S | N | T | C | D |
| 438/77                  | KF434369 | Australia   | 1977 | Abortigenic     | S | N | - | - | - |
| HH1                     | AB992258 | Japan       | 1970 | Abortigenic     | S | N | T | C | D |
| Army 183                | KU206477 | USA         | 1941 | Respiratory     | S | D | - | - | - |

- Asterisk at the end of the accession number represents new submissions within the current manuscript.
